# Supplementary material for: Impacts of Aerosol Loading in the Hindu Kush Himalayan Region Based on MERRA-2 Reanalysis Data
Source: MDPI journal article supplement (doi:10.3390/atmos12101290), 2021-10-03
Supplement: s1 [file s1]

Archive with 1 entries (1 files):
- atmosphere-1360383-supplementary.pdf
