# Supplementary material for: Impacts of Aerosol Loading in the Hindu Kush Himalayan Region Based on MERRA-2 Reanalysis Data
Source: MDPI journal article supplement (doi:10.3390/atmos12101290), 2021-10-03
Supplement: s1 [file s1 › atmosphere-1360383-supplementary.pdf]

*Supplementary Material*

# Impact of aerosol loading in the Hindu Kush Himalayan region based on MERRA-2 reanalysis data

Shantikumar S Ningombam<sup>1\*</sup>, Umesh Chandra Dumka<sup>2\*</sup>, S. K. Mugli<sup>3</sup>, J. C. Kuniyal<sup>4</sup>, Rakesh K. Hooda<sup>5</sup>, Alok Sagar Gautam<sup>6</sup>, and Suresh Tiwari<sup>7</sup>

<sup>1</sup>Indian Institute of Astrophysics, Bangalore, India; [shanti@iiap.res.in](mailto:shanti@iiap.res.in)

<sup>2</sup>Aryabhata Research Institute of Observational Sciences, Nainital 263001, India; [dumka@aries.res.in](mailto:dumka@aries.res.in)

<sup>3</sup>Physics Department, St. Joseph's College, Bangalore, India; [mugilnimbus@outlook.com](mailto:mugilnimbus@outlook.com)

<sup>4</sup>G. B. Pant National Institute of Himalayan Environment, Kosi-Katarmal, Almora, India; [jckuniyal@rediffmail.com](mailto:jckuniyal@rediffmail.com)

<sup>5</sup>Finnish Meteorological Institute, Erik Palménin aukio 1, FI-00560 Helsinki, Finland; [rakesh.hooda@fmi.fi](mailto:rakesh.hooda@fmi.fi)

<sup>6</sup>Department of Physics, Hemvati Nandan Bahuguna Garhwal University, Srinagar, India; [as.gautam@hnbgu.ac.in](mailto:as.gautam@hnbgu.ac.in)

<sup>7</sup>Indian Institute of Tropical Meteorology, New Delhi Branch, New Delhi, India; [smbtiwari@tropmet.res.in](mailto:smbtiwari@tropmet.res.in)

\*Correspondence: [dumka@aries.res.in](mailto:dumka@aries.res.in); [ucdumka@gmail.com](mailto:ucdumka@gmail.com); shanti@iiap.res.in

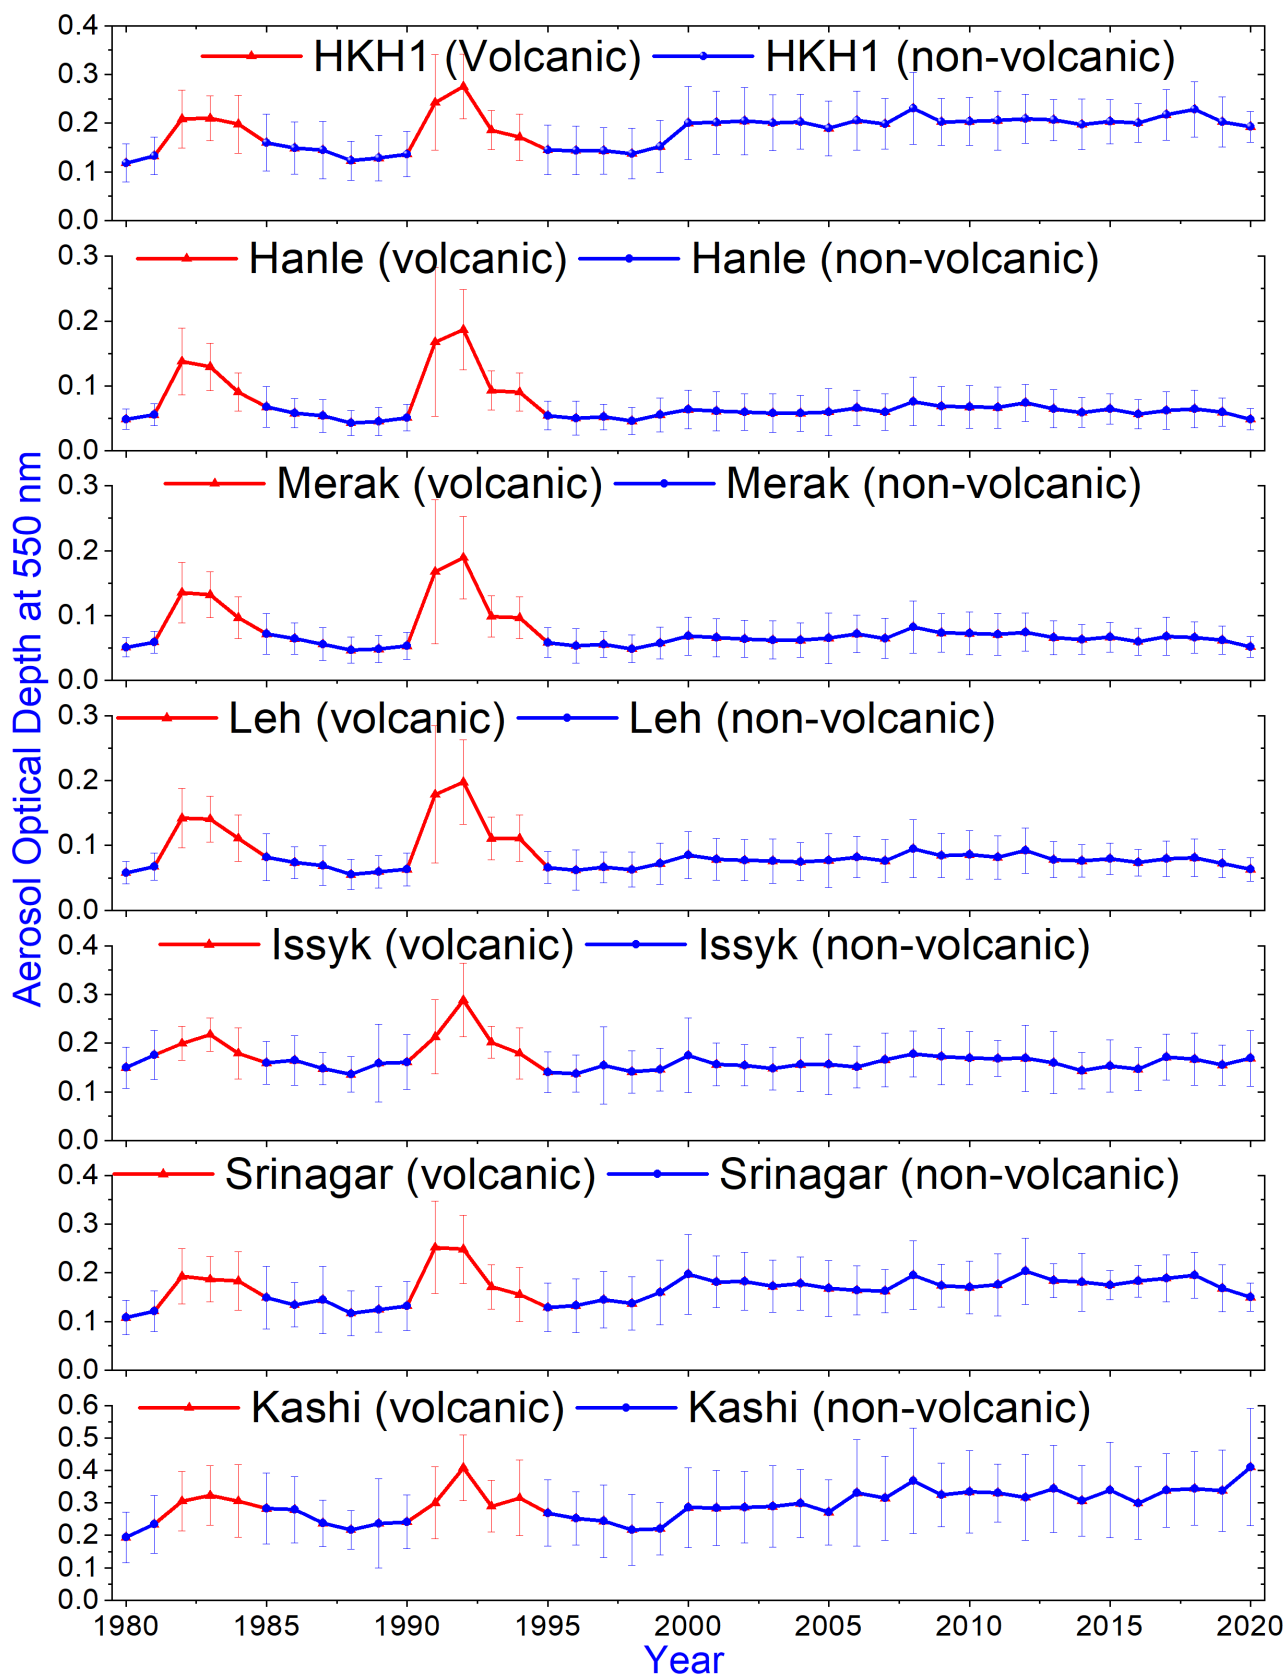

**Figure S1.** Yearly time series AOD (550 nm) at HKH1 region after removing the volcanic (blue color) and non-volcanic time (red color) of two major volcanic eruptions which were happening in 1982 at El Chichón and 1991 at Mt. Pinatubo.

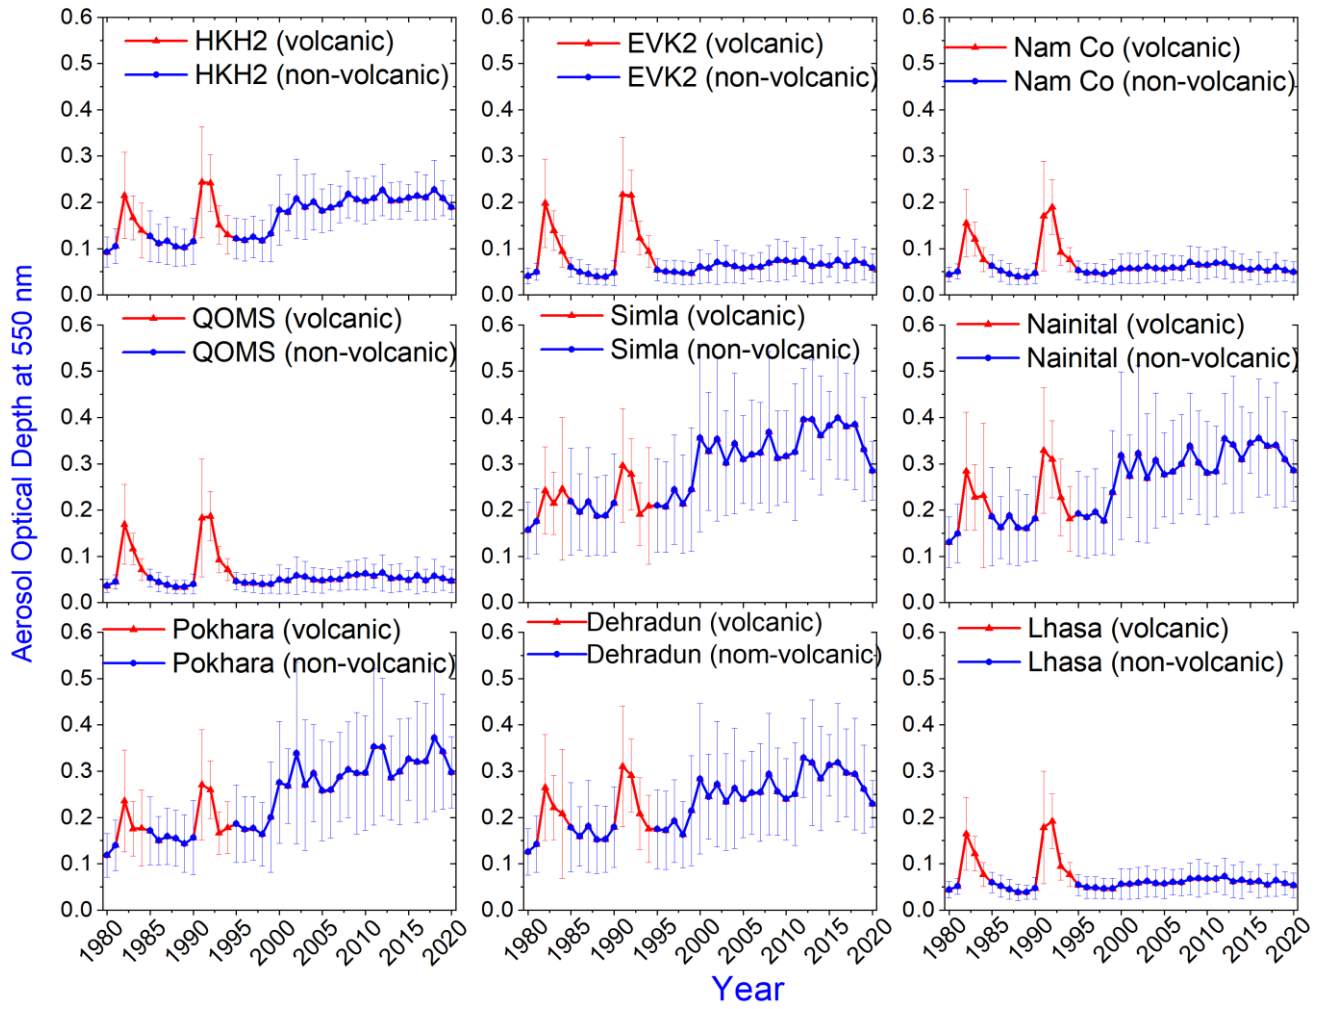

**Figure S2.** Yearly time series AOD (550 nm) at HKH2 region after removing the volcanic (blue color) and non-volcanic time (red color) of two major volcanic eruptions which were happening in 1982 at El Chichón and 1991 at Mt. Pinatubo.

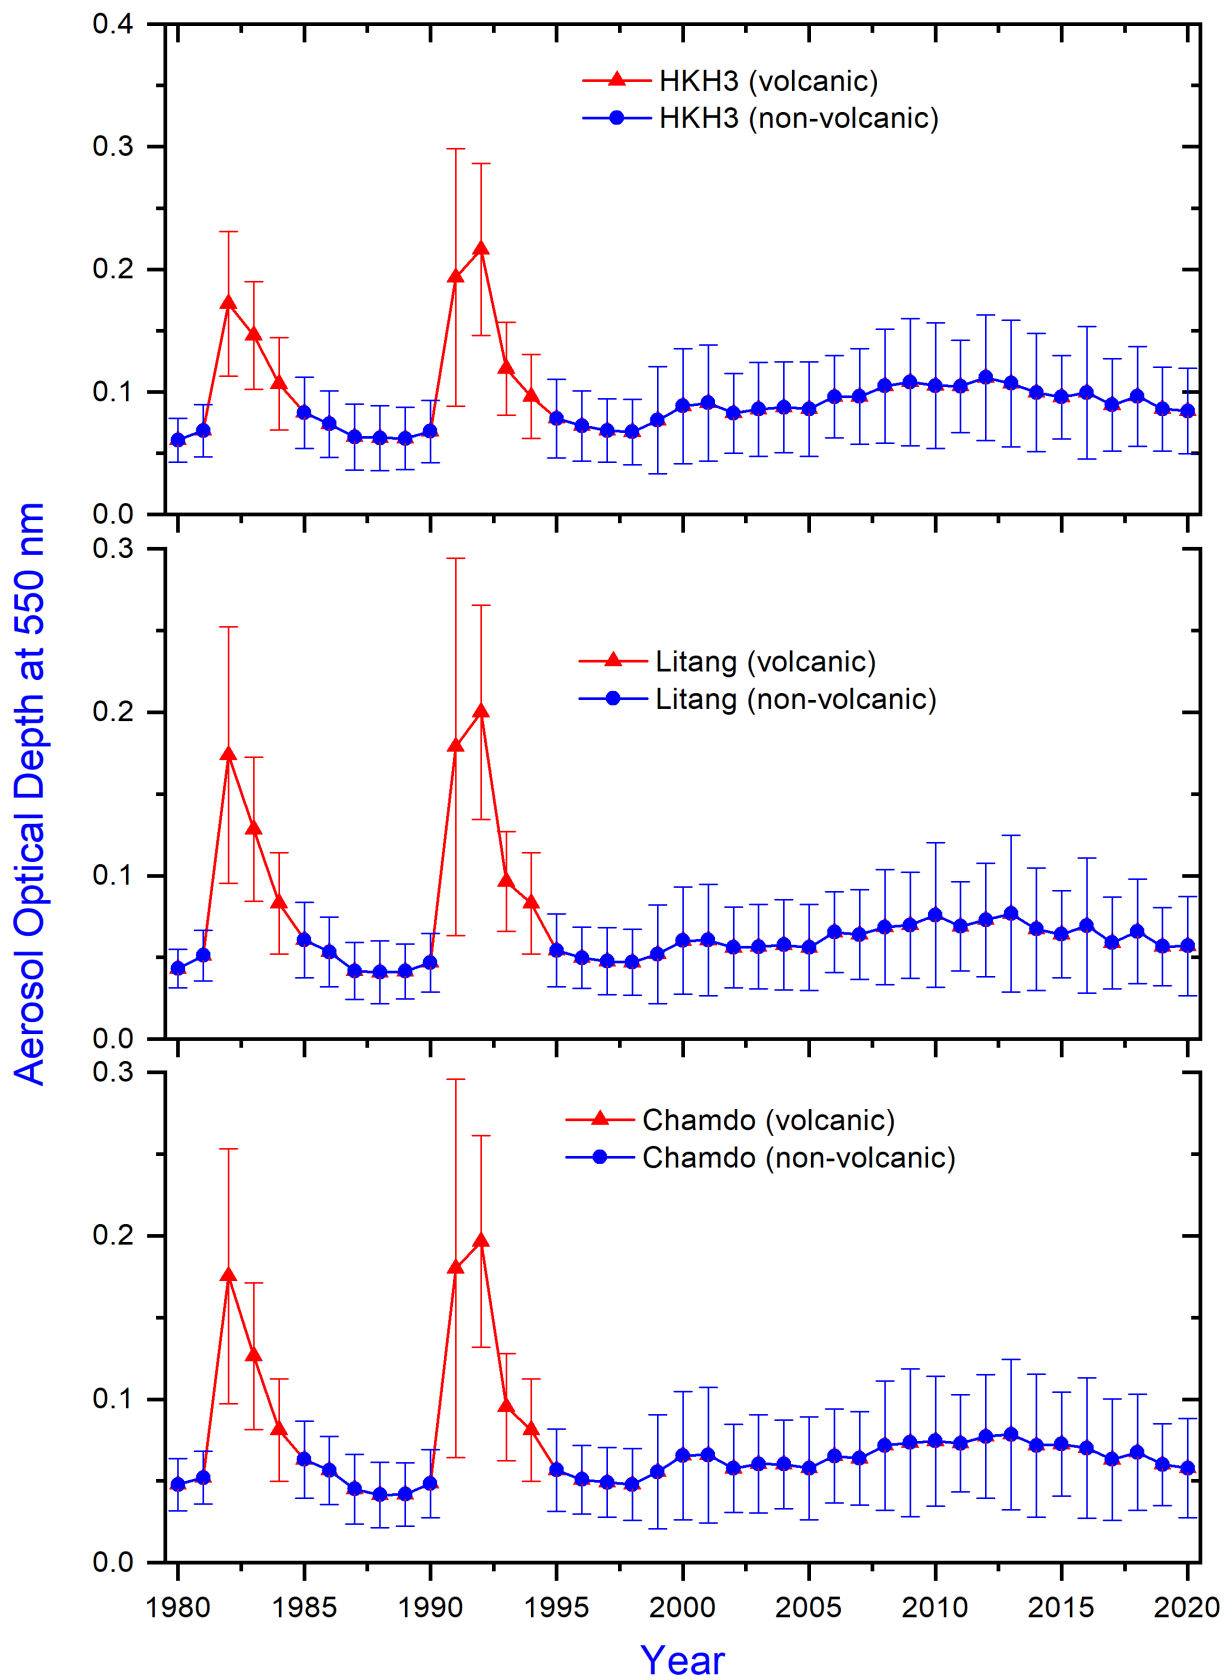

**Figure S3.** Yearly time series AOD (550 nm) at HKH3 region after removing the volcanic (blue color) and non-volcanic time (red color) of two major volcanic eruptions which were happening in 1982 at El Chichón and 1991 at Mt. Pinatubo.

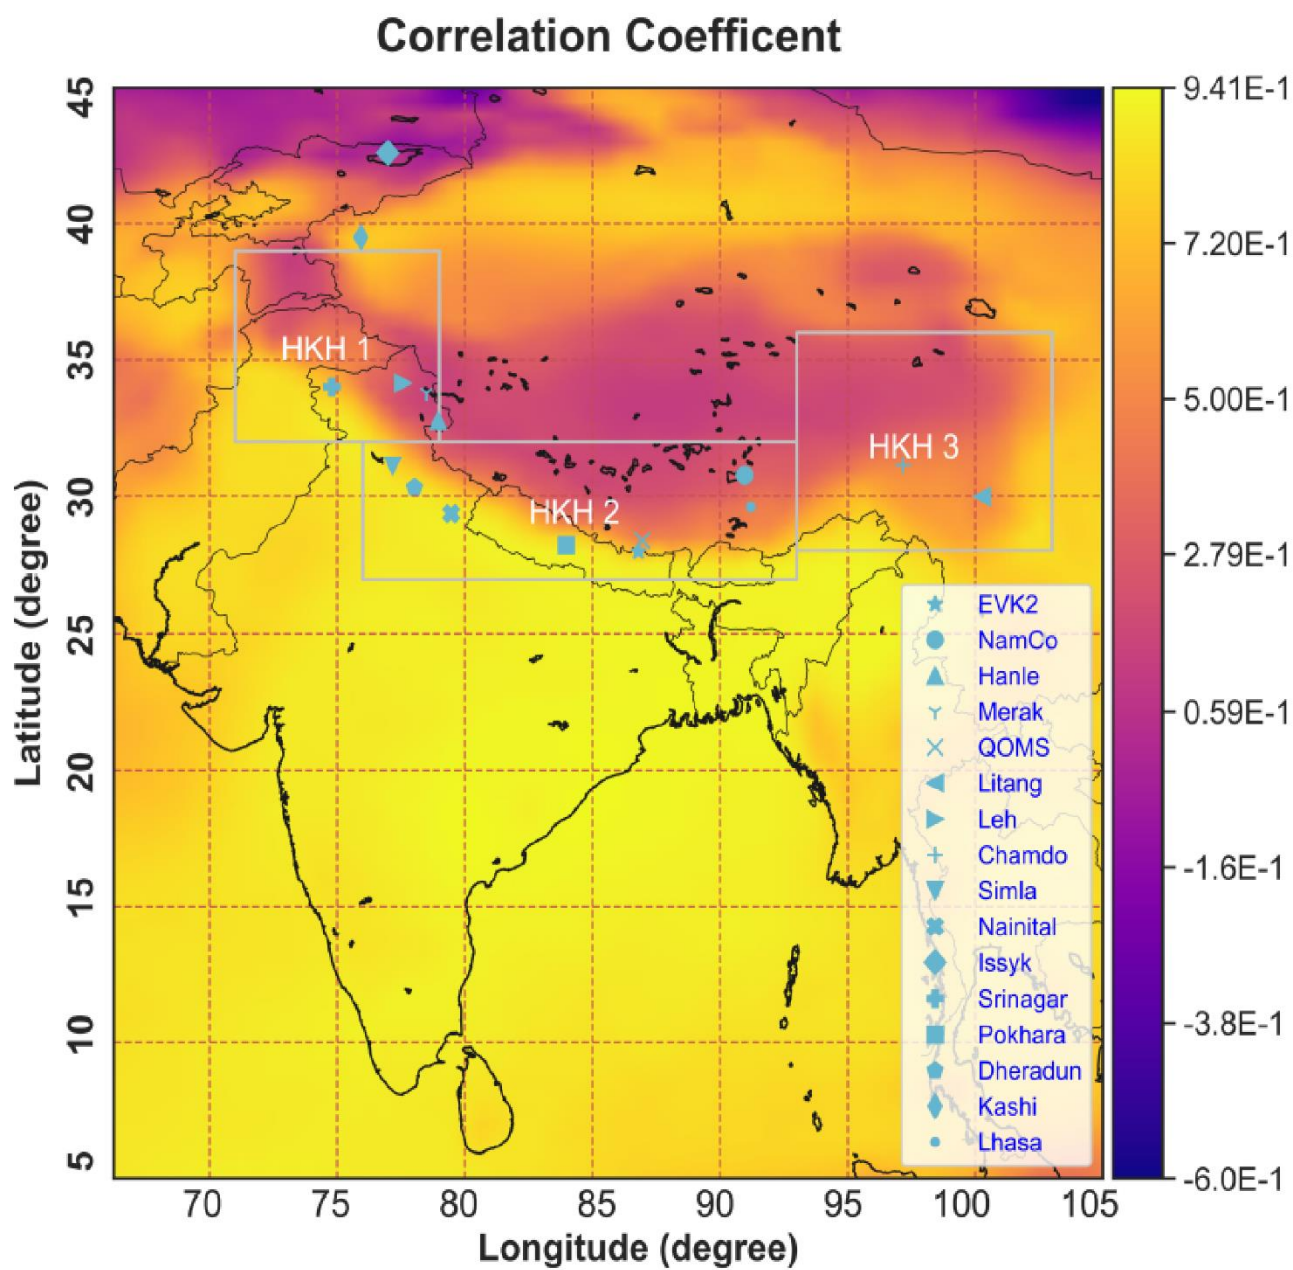

**Figure S4.** Correlation coefficient (R) for estimating trend estimation using MERRA-2 AOD at 550 nm during 1980-2020 over the sub-continent India.

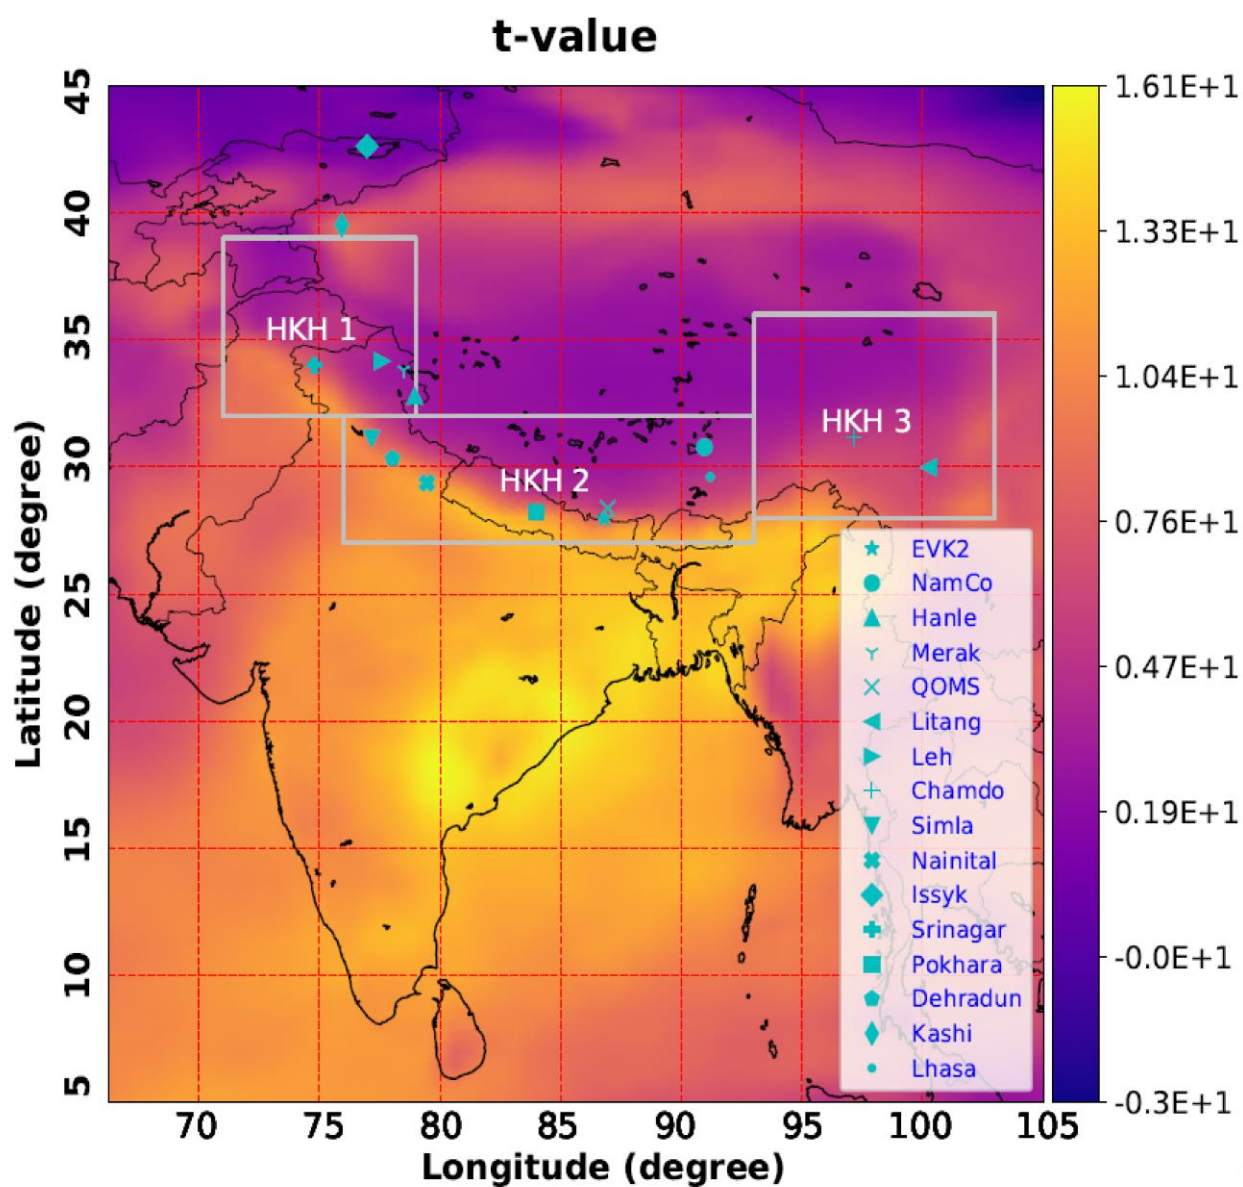

**Figure S5.** Student t test (t) or confidence level for estimating trend estimation using MERRA-2 AOD at 550 nm during 1980-2020 over the sub-continent India.
